# Supplementary material for: Retracted Article: CuS nanocrystal@microgel nanocomposites for light-regulated release of dual-drugs and chemo-photothermal synergistic therapy in vitro
Source: Royal Society of Chemistry journal article supplement (doi:10.1039/c5ra25870g), 2016-01-01
Supplement: c5ra25870g1.pdf [file c5ra25870g1.pdf]

## Supporting Information

---

### 1 CuS nanocrystal@microgel nanocomposites for light-regulated release of 2 dual-drugs and chemo-photothermal synergistic therapy *in vitro*

3

4 Jie Sun,<sup>\*ab‡</sup> Rijun Gui,<sup>c‡</sup> Hui Jin,<sup>c</sup> Na Li<sup>ab</sup> and Xiaojing Wang<sup>\*ab</sup>

5

6 <sup>a</sup> Institute of Materia Medica, Shandong Academy of Medical Sciences, Jinan 250062, PR China.

7 E-mail address: mls\_sunj@ujn.edu.cn; 94724500@qq.com. Fax: +86 531 82919963; Tel.: +86

8 531 67816486

9 <sup>b</sup> School of Medicine and Life Science, University of Jinan, Jinan 250200, PR China

10 <sup>c</sup> Department of Chemistry, College of Chemistry and Chemical Engineering, Qingdao University,

11 Shandong 266071, PR China

12 ‡ These authors have the equivalent contribution to this work.

13

### 14 **Part S1: Preparation of citrate-stabilized CuS NCs**

15 Citrate-stabilized CuS NCs were prepared by a slightly modified method reported previously  
16 (*ACS Nano*, 2015, **9**, 3926). In a typical experiment, 20 mL of Cu(CH<sub>3</sub>COO)<sub>2</sub> aqueous solution  
17 (1.7 mg mL<sup>-1</sup>) and 20 mL of sodium citrate (2.0 mg mL<sup>-1</sup>) were added in 50 mL of distilled water.  
18 The mixture solution was stirred for 30 min at room temperature. Then, 10 mL of Na<sub>2</sub>S (3.4 mg  
19 mL<sup>-1</sup>) was added to the mixture solution and stirred for additional 5 min before transferring to a 90  
20 °C water bath. The preparation reaction was continuously conducted for 20 min. After that, the  
21 reaction solution was cooled to room temperature. The as-prepared aqueous suspension of CuS  
22 NCs was concentrated by circumrotate evaporation, precipitated with 2-propanol and collected by  
23 centrifugation. Colloidal precipitates were dried in vacuum at 60 °C, and re-dispersed in aqueous  
24 solution for subsequent experiments.

25

### 26 **Part S2: Determination method of NO concentration**

27 To detect NO released from Dox/RBS-loaded CuS@PNIPAM-g-CS nanocomposites in water-

## Supporting Information

soluble mediums (PBS, 10 mM, pH6.5), the method of colorimetric Griess reaction was utilized to measure nitrite or nitrate contents in PBS of nanocomposites. The details are available as follows. Upon irradiation of 365 nm light (0.5 W, 0~60 min), the aliquots of PBS aqueous suspension of nanocomposites ( $0.1 \text{ mg mL}^{-1}$ , 5 mL) were taken and then stirred in a centrifugal tube at room temperature. At defined time intervals, the solution was centrifuged for 10 min and the supernatant (0.5 mL) was extracted and replenished with PBS, followed by the combination with the Griess reagent (I) (0.1 wt.% of  $\beta$ -naphthylethylenediamine dihydrochloride aqueous solution, 1 mL) and the Griess reagent (II) (1 wt.% of sulfanilamide in 5 wt.% of phosphoric acid aqueous solution, 1 mL). The resultant mixed solution was incubated for 15 min at room temperature and protected from light (in the dark). A purple-magenta color appeared immediately. The maximum absorbance was recorded (at 540 nm) using UV-vis spectrophotometer. The standard curve was determined by measuring sodium nitrite (0-100  $\mu\text{M}$ ) in PBS. The total release of NO was calculated by using the following equations:

$$R_1 = C_1 \times 0.005;$$

$$R_2 = C_2 \times 0.005 + C_1 \times 0.001;$$

$$R_3 = C_3 \times 0.005 + (C_2 + C_1) \times 0.001;$$

$$\dots\dots$$

$$R_n = C_n \times 0.005 + (C_{n-1} + C_{n-2} + \dots\dots + C_1) \times 0.001$$

where  $R_n$  is the release amount of NO measured at each time point, and  $C_n$  is the concentration of NO.

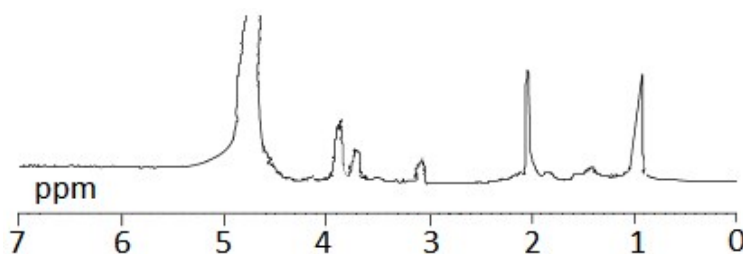

**Fig. S1**  $^1\text{H}$ -NMR spectrum of PNIPAM-g-CS microgels.

## Supporting Information

<sup>1</sup>H-NMR spectrum indicates the achievement of PNIPAM-g-CS microgels as below. <sup>1</sup>H-NMR spectrum indicates a sharp proton peak (-CH-CH<sub>2</sub>-) at 2.0 ppm, a weak peak (-NH-CH<) at 3.2 ppm and a strong methyl group peak at 1.0 ppm, which are derived from PNIPAM. The strong and broad spectrum band at 4.9 ppm and a weak peak at 3.1 ppm correspond to the proton on the anomeric carbon and on the carbon bearing amino (partially acetamido) groups from CS. The middle-strong peak (RO-CH) at 3.9 ppm is similar to that of CS. The above results demonstrate that the graft reaction had been performed. Because the C<sub>6</sub>-OH and C<sub>2</sub>-NH<sub>2</sub> of chitosan are more active groups (R. A. A. Muzzarelli, *Carbohydr. Polym.*, 1988, **8**, 1), the grafting copolymers are reacted more easily on the positions.

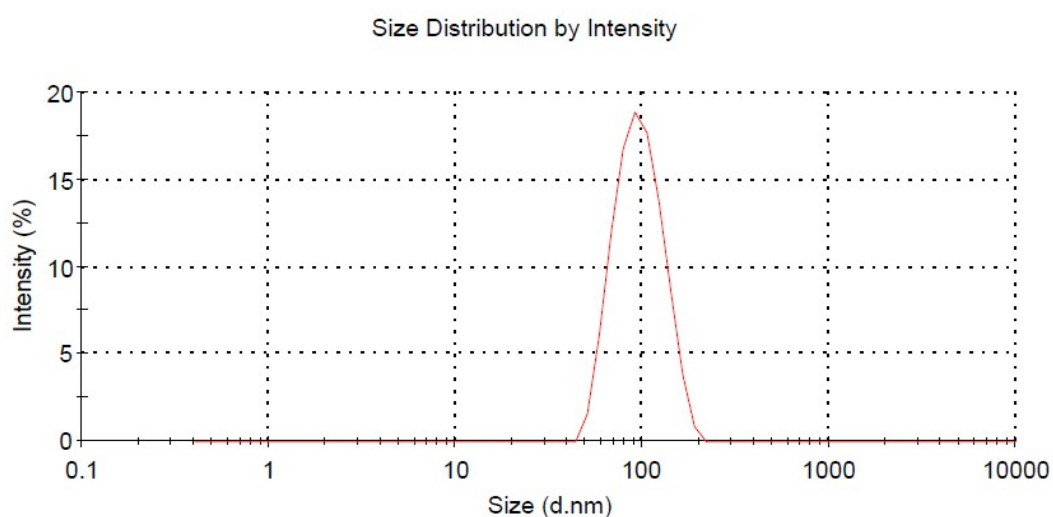

**Fig. S2** Size distribution of CuS@PNIPAM-g-CS nanocomposites with NIR-light irradiation (980 nm, 0.5W) for 0~120s, determined by DLS and showed an average size of 91.5 nm.

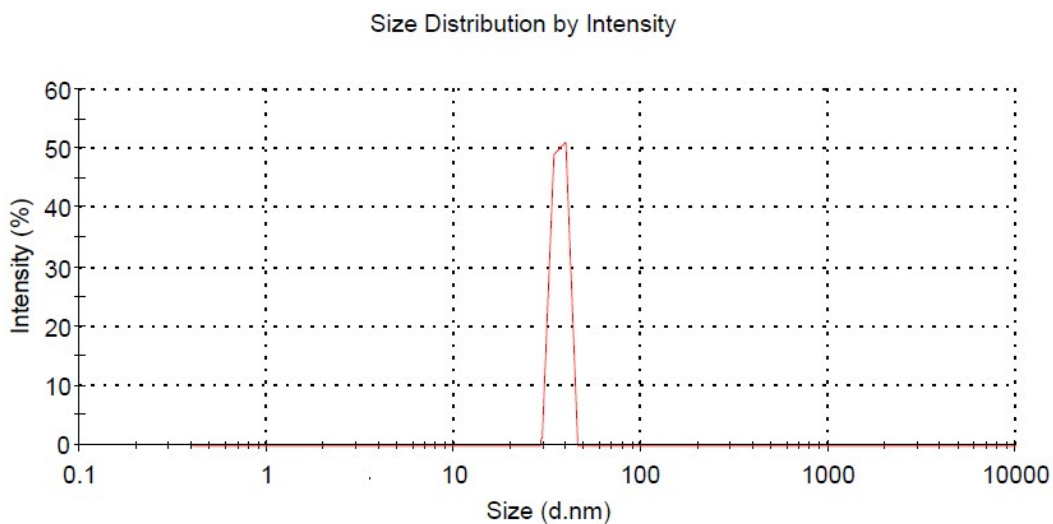

## Supporting Information

**Fig. S3** Size distribution of CuS@PNIPAM-g-CS nanocomposites with NIR-light irradiation (980 nm, 0.5W) for 120~210s, determined by DLS and showed an average size of 39.9 nm.

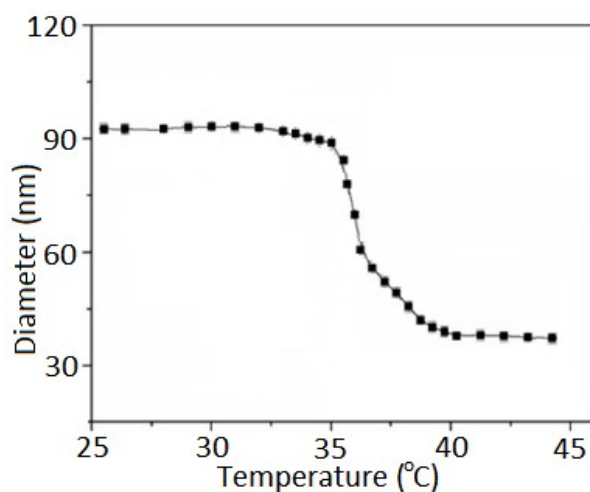

**Fig. S4** Hydrodynamic diameters of CuS@PNIPAM-g-CS nanocomposites, placed in a water bath and treated by increasing temperature of water bath.

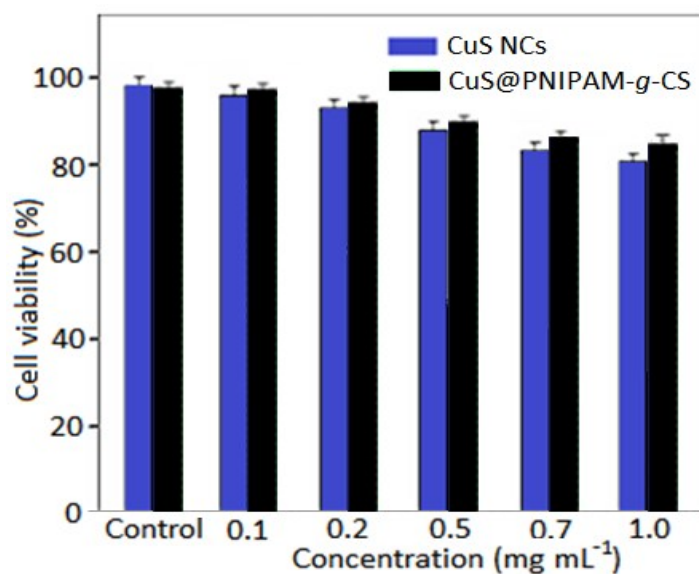

**Fig. S5** *In vitro* cell viabilities after incubation with different dosages (0-1 mg mL<sup>-1</sup>) of CuS NCs and CuS@PNIPAM-g-CS nanocomposites.

## Supporting Information

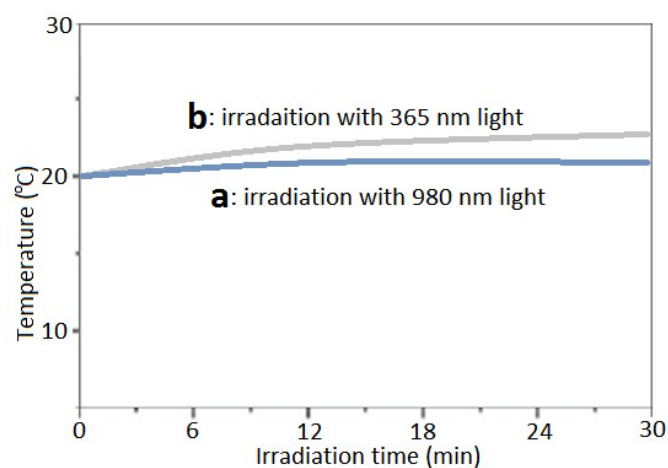

1

2 **Fig. S6** Temperature elevation in the microenvironment of HeLa cells directly treated with 0.5 W

3 of light irradiation at 980 nm (a) and 365 nm (b) for 0-30 min, without the incubation with

4 CuS@PNIPAM-g-CS nanocomposites.

5

6
